# Supplementary material for: Disease ecology and zoonotic risk of clade 2.3.4.4b H5N1 high pathogenicity avian influenza in the sub-Antarctic region
Source: Research Square preprint supplement (doi:10.21203/rs.3.rs-8029950/v1), 2025-11-11
Supplement: Supplementary file 1 [file 32f150d8bd32515142b66c72.docx]

|  | | | | | A/Astrakhan/3212/2020 | A/American wigeon/South Carolina/22-000345-001/2021 | A/chicken/Ghana/AVL-76321VIR7050-39/2021 |
| --- | --- | --- | --- | --- | --- | --- | --- |
|  |  |  | **Ferret ID** | | GA04202022 | 2019-137 | GA06232023 |
| **Reference Viruses** | **Clade** | **Subtype** | **Passage** | **Clade** | 2.3.4.4b | 2.3.4.4b | 2.3.4.4b |
| A/Astrakhan/3212/2020  *IDCDC-RG71A* | 2.3.4.4b | H5N8 | V1E2/Ex |  | **320** | 40 | 5120 |
| A/American wigeon/South Carolina/22-000345-001/2021  *IDCDC-RG78A* | 2.3.4.4b | H5N1 | V1E2/E1 |  | 320 | **80** | 2560 |
| A/chicken/Ghana/AVL-76321VIR7050-39/2021  *IDCDC-RG80A* | 2.3.4.4b | H5N1 | V1E2/E1 |  | < | < | **2560** |
| **Test Viruses** |  |  |  |  |  |  |  |
| A/fur_seal/Miles_Bay/004783/2024 | 2.3.4.4b | H5 | Ex/M1 |  | 40 | 40 | 1280 |
| A/fur_seal/Salisbury_Plain/004762/2024 | 2.3.4.4b | H5 | Ex/E1 |  | 40 | 40 | 1280 |
| A/brown_skua/Hound_Bay/133949/2023 | 2.3.4.4b | H5 | Ex/E1 |  | < | 80 | 2560 |
| A/brown_skua/Hound_Bay/133947/2023 | 2.3.4.4b | H5 | Ex/E1 |  | < | 80 | 2560 |
| A/kelp_gull/Moltke_Harbour/133754/2023 | 2.3.4.4b | H5 | Ex/E1 |  | 40 | 40 | 1280 |
| < indicates reactivity <20, the lowest dilution of antisera. Homologous reference titre bolded and in grey. Titres ≥8-fold lower than reference homologous antigen in red. Assay performed at 4°C using turkey RBC. N/A; Not Applicable, ND; Not Determined | | | | | | | |
