# Supplementary material for: Disease ecology and zoonotic risk of clade 2.3.4.4b H5N1 high pathogenicity avian influenza in the sub-Antarctic region
Source: Research Square preprint supplement (doi:10.21203/rs.3.rs-8029950/v1), 2025-11-11
Supplement: Supplementary file 2 [file d4a401936ef089a72aa68d49.xlsx]

## Sheet: Sheet1
	Table 1. Summary of H5 HPAIV Detections in the Falkland Islands and South Georgia for individuals, December 2023 to February 2024
	Location	Class	Species	Common Name	% Positive	H5 HPAIV +ve (Total Tested)
	South Georgia	Aves	Diomedea exulans	Snowy albatross	100	9 (9)
		Aves	Stercorarius antarcticus	Brown skua	69	9 (13)
		Aves	Macronectes spp.	Giant petrel (Northern & Southern)	0	0 (6)
		Aves	Aptenodytes patagonicus	King penguin	45	5 (11)
		Aves	Pygoscelis papua	Gentoo penguin	45	5 (11)
		Aves	Chionis albus	Snowy sheathbill	0	0 (1)
		Mammalia	Arctocephalus gazella	Antarctic fur seal	80	40 (50)
		Mammalia	Mirounga leonina	Southern elephant seal	55	11 (20)
	Falkland Islands	Aves	Pygoscelis papua	Gentoo penguin	45	5 (11)
		Aves	Thalassarche melanophris	Black-browed albatross	92	23 (25)
		Aves	Leucocarbo magellanicus	Rock shag	0	0 (1)
		Aves	Eudyptes chrysocome	Southern rockhopper penguin	83	5 (6)
		Aves	Turdus falklandii falklandii	Austral thrush	0	0 (1)
		Aves	Geranoaetus polyosoma	Variable hawk	100	1 (1)
